# Supplementary material for: Sulfated tungstate: an efficient catalyst for the Ritter reaction
Source: Royal Society of Chemistry journal article supplement (doi:10.1039/c0gc00759e), 2011-01-01
Supplement: c0gc00759e.pdf [file c0gc00759e.pdf]

## **Sulfated tungstate: an efficient catalyst for Ritter reaction**

Kamlesh V. Katkar, Pramod S. Chaudhari and Krishnacharya G. Akamanchi\*

*Department of Pharmaceutical Sciences and Technology,  
Institute of Chemical Technology, Matunga, Mumbai 400 019.*

[kgap@rediffmail.com](mailto:kgap@rediffmail.com)

### **SUPPORTING INFORMATION**

#### **Contents**

**A) Experimental**

**B) Amide Analytical Data**

**C) Green Metrics**

**D) NMR Spectra**

**E) References**

## A) Experimental

### a) Reagents:

All chemicals were purchased from Spectrochem Pvt. Ltd. India and were used without further purification.

### b) General procedure for Ritter reaction:

A mixture of 1-phenylethanol (1g, 8.19 mmol), benzonitrile (0.844g, 8.19 mmol), and sulfated tungstate (0.368 g, 20 wt%) was placed in a round bottom flask. The materials were mixed and heated at 100 °C for the given time. The progress of the reaction was monitored by TLC. After the completion of the reaction, diluted the reaction mixture with EtOAc (15ml) and filtered to recover the catalyst. The organic layer was concentrated under reduced pressure and crude residue obtained was recrystallised with hexane gave *N*-(1-Phenylethyl)benzamide as a white solid (entry 9).

## B) Amide Analytical Data

Entry 1) *N*-*tert*-butylacetamide

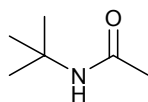

m.p. 95- 96 °C (lit.<sup>1</sup> 97-98 °C);  $\nu_{\max}(\text{KBr})/\text{cm}^{-1}$  3445 (NH), 1655 (C=O);  $\delta_{\text{H}}(300 \text{ MHz}; \text{CDCl}_3; \text{Me}_4\text{Si})$  1.34 (9 H, s), 1.98 (3 H, s) and 7.57 (NH, br s);  $\delta_{\text{C}}(75 \text{ MHz}; \text{CDCl}_3; \text{Me}_4\text{Si})$  23.9, 28.5, 51.0 and 170.3.

Entry 2) *N*<sup>1</sup>, *N*<sup>3</sup>-di-*tert*-butylmalonamide

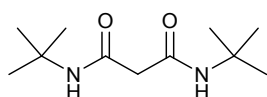

m.p. 114-115 °C (lit.<sup>2</sup> 112-113 °C);  $\nu_{\max}(\text{KBr})/\text{cm}^{-1}$  3420 (NH), 1660 (C=O);  $\delta_{\text{H}}(300 \text{ MHz}; \text{CDCl}_3; \text{Me}_4\text{Si})$  1.30 (18 H, s), 3.07 (2 H, s) and 6.70 (1 H, br s);  $\delta_{\text{C}}(75 \text{ MHz}; \text{CDCl}_3; \text{Me}_4\text{Si})$  30.5, 44.0, 46.0 and 166.3.

Entry 3) *N*-*tert*-butylacrylamide

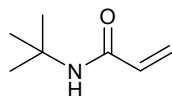

m.p. 125-127 °C (lit.,<sup>3</sup> 126-128 °C);  $\nu_{\max}(\text{KBr})/\text{cm}^{-1}$  3460 (NH), 1630 (C=C), 1660 (C=O);  $\delta_{\text{H}}(300 \text{ MHz}; \text{CDCl}_3; \text{Me}_4\text{Si})$  1.38 (9 H, s), 5.42 (1 H, dd), 5.57 (1 H, dd), 6.17 (1 H, dd) and 7.24 (1 H, br s);  $\delta_{\text{C}}(75 \text{ MHz}; \text{CDCl}_3; \text{Me}_4\text{Si})$  28.7, 51.2, 125.2, 131.8 and 165.3.

Entry 4) *N*-*tert*-butylbenzamide

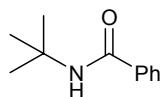

m.p. 129-130 °C (lit.,<sup>4</sup> 128-129 °C);  $\nu_{\max}(\text{KBr})/\text{cm}^{-1}$  3460 (NH), 1660 (C=O);  $\delta_{\text{H}}(300 \text{ MHz}; \text{CDCl}_3; \text{Me}_4\text{Si})$  1.49 (9 H, s), 6.19 (1 H, br s) and 7.44-7.88 (5 H, m);  $\delta_{\text{C}}(75 \text{ MHz}; \text{CDCl}_3; \text{Me}_4\text{Si})$  29.0, 49.5, 126.5, 128.4, 130.7, 135.0 and 166.3.

Entry 5) *N*-*tert*-butyl-2-chlorobenzamide

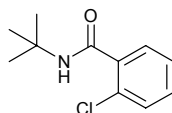

m.p. 106-107 °C (lit.,<sup>5</sup> 106-108 °C);  $\nu_{\max}(\text{KBr})/\text{cm}^{-1}$  3420 (NH), 1640 (C=O);  $\delta_{\text{H}}(300 \text{ MHz}; \text{CDCl}_3; \text{Me}_4\text{Si})$  1.38 (9 H, s), 6.0 (1 H, br s) and 7.25 (4 H, m);  $\delta_{\text{C}}(75 \text{ MHz}; \text{CDCl}_3; \text{Me}_4\text{Si})$  31.0, 47.5, 127.2, 128.4, 128.0, 129.4, 132.0, 133.2, 134.0 and 167.3.

Entry 6) *N*-*tert*-butyl-2-phenylacetamide

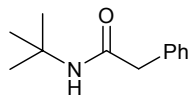

m.p. 113-115 °C (lit.,<sup>6</sup> 115-116 °C);  $\nu_{\max}(\text{KBr})/\text{cm}^{-1}$  3420 (NH), 1648 (C=O);  $\delta_{\text{H}}(300 \text{ MHz}; \text{CDCl}_3; \text{Me}_4\text{Si})$  1.66 (9 H, s), 3.60 (2 H, s), 5.40 (1 H, br s) and 7.33 (5 H, m);  $\delta_{\text{C}}(75 \text{ MHz}; \text{CDCl}_3; \text{Me}_4\text{Si})$  31.0, 41.5, 47.2, 127.2, 129.4, 130.0, 132.4 and 171.3.

Entry 7) *N*-(1-phenylethyl)acetamide

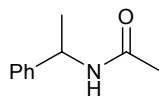

m.p. 75-76 °C (lit.,<sup>7</sup> 75-77 °C);  $\nu_{\max}$ (KBr)/cm<sup>-1</sup> 3425 (NH), 1650(C=O);  $\delta_{\text{H}}$ (300 MHz; CDCl<sub>3</sub>; Me<sub>4</sub>Si) 1.42 (3 H, d), 1.76 (3 H, s), 5.34 (1 H, quartet), 6.31 (1 H, br s) and 7.15 (5 H, m);  $\delta_{\text{C}}$ (75 MHz; CDCl<sub>3</sub>; Me<sub>4</sub>Si) 21.0, 23.0, 49.5, 126.0, 127.2, 128.4, 143.0, and 170.0.

Entry 8) 2-chloro-*N*-(1-phenylethyl)acetamide

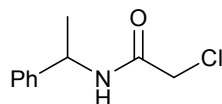

m.p. 69-71 °C (lit.,<sup>7</sup> 70-72 °C);  $\nu_{\max}$ (KBr)/cm<sup>-1</sup> 3445 (NH), 1655(C=O);  $\delta_{\text{H}}$ (300 MHz; CDCl<sub>3</sub>; Me<sub>4</sub>Si) 1.64 (3 H, d), 4.06 (2 H, s), 5.34 (1 H, quartet), 6.26 (1 H, br s) and 7.26-7.34 (5 H, m);  $\delta_{\text{C}}$ (75 MHz; CDCl<sub>3</sub>; Me<sub>4</sub>Si) 21.0, 55.0, 49.5, 126.0, 127.7, 129.4, 143.5, and 171.0.

Entry 9) *N*-(1-Phenylethyl)benzamide

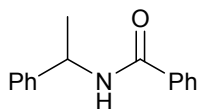

m.p. 103-105 °C (lit.,<sup>8</sup> 103-104 °C);  $\nu_{\max}$ (KBr)/cm<sup>-1</sup> 3360 (NH), 1640(C=O);  $\delta_{\text{H}}$ (300 MHz; CDCl<sub>3</sub>; Me<sub>4</sub>Si) 1.58 (3 H, d), 5.20 (1 H, quartet), 6.5 (1 H, br s) and 7.34-7.90 (10 H, m);  $\delta_{\text{C}}$ (75 MHz; CDCl<sub>3</sub>; Me<sub>4</sub>Si) 21.0, 50.0, 126.8, 127.0, 127.4, 128.6, 128.9, 132.2, 143.5 and 167.5.

Entry 10) 2-phenyl-*N*-(1-phenylethyl)acetamide

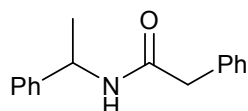

m.p. 100-101 °C (lit.,<sup>7</sup> 98-100 °C);  $\nu_{\max}$ (KBr)/cm<sup>-1</sup> 3370 (NH), 1650(C=O);  $\delta_{\text{H}}$ (300 MHz; CDCl<sub>3</sub>; Me<sub>4</sub>Si) 1.59 (3 H, d), 3.52 (2 H, s), 5.23 (1 H, quartet), 7.6 (1 H, br s) and 7.26 (10 H, m);  $\delta_{\text{C}}$ (75 MHz; CDCl<sub>3</sub>; Me<sub>4</sub>Si) 21.0, 50.0, 54.0, 125.8, 127.0, 127.6, 128.2, 128.9, 131.2, 142.5 and 168.5.

Entry 11) 2-(4-chlorophenyl)-*N*-(1-phenylethyl)acetamide

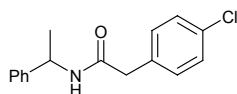

m.p. 108-109 °C (lit.,<sup>7</sup> 110-111 °C);  $\nu_{\max}(\text{KBr})/\text{cm}^{-1}$  3372(NH), 1657(C=O);  $\delta_{\text{H}}(300 \text{ MHz}; \text{CDCl}_3; \text{Me}_4\text{Si})$  1.60 (3 H, d), 3.64 (2 H, s), 5.52 (1 H, quartet), 7.40 (1 H, br s) and 7.32-7.37 (9 H, m);  $\delta_{\text{C}}(75 \text{ MHz}; \text{CDCl}_3; \text{Me}_4\text{Si})$  21.0, 41.0, 49.0, 126.8, 127.0, 128.0, 129.4, 131.1, 133.2, 133.8, 142.2 and 166.5.

Entry 12) *N*-(1-phenylethyl)isonicotinamide

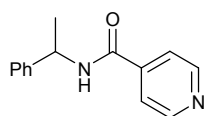

m.p. 119-120 °C (lit.,<sup>8</sup> 118-120 °C);  $\nu_{\max}(\text{KBr})/\text{cm}^{-1}$  3380(NH), 1640(C=O);  $\delta_{\text{H}}(300 \text{ MHz}; \text{CDCl}_3; \text{Me}_4\text{Si})$  1.77 (3 H, d), 5.09 (1 H, quartet), 6.21 (1 H, br s), 7.66-7.74 (5 H, m), 8.56-8.89 (4 H, m);  $\delta_{\text{C}}(75 \text{ MHz}; \text{CDCl}_3; \text{Me}_4\text{Si})$  21.0, 49.0, 122.8, 127.0, 126.8, 128.2, 140.0, 143.0, 149.0 and 167.5.

Entry 13) *N*-benzhydrylacetylacetamide

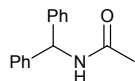

m.p. 144-146 °C (lit.,<sup>9</sup> 146 °C);  $\nu_{\max}(\text{KBr})/\text{cm}^{-1}$  3350(NH), 1645(C=O);  $\delta_{\text{H}}(300 \text{ MHz}; \text{CDCl}_3; \text{Me}_4\text{Si})$  2.00 (3 H, s), 6.17 (1 H, s), 5.73 (1 H, br s), 7.24 (10 H, m);  $\delta_{\text{C}}(75 \text{ MHz}; \text{CDCl}_3; \text{Me}_4\text{Si})$  23.0, 60.0, 126.8, 128.3, 129.3, 142.2 and 170.5.

Entry 14) *N*-benzhydrylbenzamide

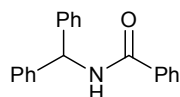

m.p. 171-172 °C (lit.,<sup>9</sup> 170-172 °C);  $\nu_{\max}(\text{KBr})/\text{cm}^{-1}$  3340(NH), 1635(C=O);  $\delta_{\text{H}}(300 \text{ MHz}; \text{CDCl}_3; \text{Me}_4\text{Si})$  6.36 (1 H, s), 7.68 (1 H, br s), 7.19-7.72 (15 H, m);  $\delta_{\text{C}}(75 \text{ MHz}; \text{CDCl}_3; \text{Me}_4\text{Si})$  60.0, 126.3, 127.5, 128.3, 129.3, 132.2, 134.2, 142.5 and 167.5.

Entry 15) *N*-benzhydryl-2-phenylacetamide

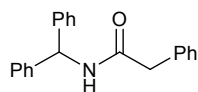

m.p. 138-140 °C (lit.,<sup>9</sup> 137-140 °C);  $\nu_{\max}(\text{KBr})/\text{cm}^{-1}$  3346(NH), 1650(C=O);  $\delta_{\text{H}}(300 \text{ MHz}; \text{CDCl}_3; \text{Me}_4\text{Si})$  3.65 (2 H, s), 5.49 (1 H, s), 6.25 (1 H, br s), 7.30-7.40 (15 H, m);  $\delta_{\text{C}}(75 \text{ MHz}; \text{CDCl}_3; \text{Me}_4\text{Si})$  42.0, 60.0, 125.3, 126.3, 128.7, 129.8, 131.2, 133.2, 141.5 and 170.5.

Entry 16) *N*-benzhydrylisonicotinamide

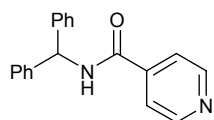

m.p. 213-215 °C (lit.,<sup>10</sup> 213-214 °C);  $\nu_{\max}(\text{KBr})/\text{cm}^{-1}$  3385(NH), 1645(C=O);  $\delta_{\text{H}}(300 \text{ MHz}; \text{CDCl}_3; \text{Me}_4\text{Si})$  5.39 (1 H, quartet), 8.77 (1 H, br s), 7.31-7.60 (14 H, m);  $\delta_{\text{C}}(75 \text{ MHz}; \text{CDCl}_3; \text{Me}_4\text{Si})$  61.0, 122.8, 127.0, 126.3, 127.2, 141.4, 142.6, 149.8 and 167.5.

Entry 17) *N*-Benzylbenzamide

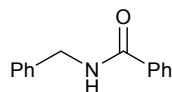

m.p. 129-130 °C (lit.,<sup>11</sup> 128-130 °C);  $\nu_{\max}(\text{KBr})/\text{cm}^{-1}$  3445 (NH), 1655 (C=O);  $\delta_{\text{H}}(300 \text{ MHz}; \text{CDCl}_3; \text{Me}_4\text{Si})$  4.65 (2 H, d,  $J=6$ ), 6.42 (1 H, br s), 7.25-7.56 (8 H, m) and 7.79 (2 H, m);  $\delta_{\text{C}}(75 \text{ MHz}; \text{CDCl}_3; \text{Me}_4\text{Si})$  44.0, 127.1, 127.5, 127.6, 127.8, 128.5, 128.6, 134.3, 138.1 and 167.3.

Entry 18) *N*-Benzyl-2-phenylacetamide

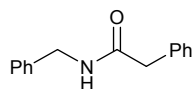

m.p. 117 °C (lit.,<sup>12</sup> 117-119 °C);  $\nu_{\max}(\text{KBr})/\text{cm}^{-1}$  3271 (NH) and 1630 (C=O);  $\delta_{\text{H}}(300 \text{ MHz}; \text{CDCl}_3; \text{Me}_4\text{Si})$  3.62 (2 H, s), 4.4 (2 H, d,  $J=6\text{Hz}$ ), 5.9 (1 H, br s) and 7.15-7.55 (10 H, m);  $\delta_{\text{C}}(75 \text{ MHz}; \text{CDCl}_3; \text{Me}_4\text{Si})$  43.4, 43.6, 127.2, 127.3, 127.4, 128.5, 128.9, 129.3, 134.8, 138.1 and 170.9.

Entry 19) *N*-cyclohexylbenzamide

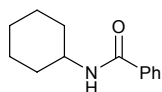

m.p. 137-139 °C (lit.,<sup>13</sup> 139-141 °C);  $\nu_{\max}(\text{KBr})/\text{cm}^{-1}$  3345 (NH), 1645 (C=O);  $\delta_{\text{H}}(300 \text{ MHz}; \text{CDCl}_3; \text{Me}_4\text{Si})$  1.18-1.28 (3 H, m), 1.32-1.43 (2 H, m), 1.62-1.78 (3 H, m), 1.96-2.04 (2 H, m), 3.93-4.06 (1 H, m), 5.22 (1 H, br s) and 7.2-7.38 (5 H, m);  $\delta_{\text{C}}(75 \text{ MHz}; \text{CDCl}_3; \text{Me}_4\text{Si})$  24.6, 25.4, 32.9, 48.0, 127.2, 128.9, 129.3, 135.1 and 169.9.

Entry 20) ( $\pm$ ) *exo*-*N*-bornylbenzamide

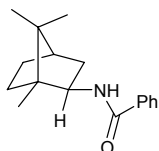

m.p. 129-130 °C (lit.,<sup>14</sup> 125-126 °C);  $\nu_{\max}(\text{KBr})/\text{cm}^{-1}$  3345 (NH), 1645 (C=O);  $\delta_{\text{H}}(300 \text{ MHz}; \text{CDCl}_3; \text{Me}_4\text{Si})$  0.88 (3 H, s), 0.92 (3 H, s), 1.01 (3 H, s), 1.19-1.25 (1 H, m), 1.33-1.42 (1 H, m), 1.59-1.84 (4 H, m), 1.93-2.01 (1 H, m), 4.08-4.15 (1 H, m), 6.08 (1 H, br s) and 7.40-7.72 (5 H, m);  $\delta_{\text{C}}(75 \text{ MHz}; \text{CDCl}_3; \text{Me}_4\text{Si})$  11.8, 20.3, 20.3, 27.1, 35.6, 39.2, 44.7, 47.2, 48.8, 57.3, 126.5, 128.5, 131.0, 135.4 and 166.9.

Entry 21) ( $\pm$ ) *exo*-*N*-bornyl-2-phenylacetamide

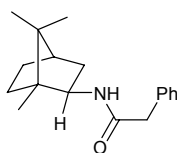

m.p. 140-141 °C (lit.,<sup>15</sup> 143 °C);  $\nu_{\max}(\text{KBr})/\text{cm}^{-1}$  3345 (NH), 1645 (C=O);  $\delta_{\text{H}}(300 \text{ MHz}; \text{CDCl}_3; \text{Me}_4\text{Si})$  0.44 (3 H, s), 0.63 (3 H, s), 0.71 (3 H, s), 1.04-1.12 (1 H, m), 1.18-1.19 (1 H, m), 1.22-1.26 (1 H, m), 1.31-1.40 (1 H, m), 1.43-1.52 (1 H, m), 1.58-1.64 (2 H, m), 1.73-1.80 (2 H, m), 3.49-3.62 (2 H, m), 3.77-3.85 (1 H, m), 5.27 (1 H, br s) and 7.20-7.37 (5 H, m);  $\delta_{\text{C}}(75 \text{ MHz}; \text{CDCl}_3; \text{Me}_4\text{Si})$  14.4, 19.5, 23.5, 31.3, 33.8, 41.4, 46.0, 51.1, 53.4, 127.3, 129.5, 129.7, 135.7 and 170.4.

### C) Green Metrics

1) Calculations for the synthesis of *N*-(1-phenylethyl) benzamide catalysed by Iodine<sup>16</sup>.

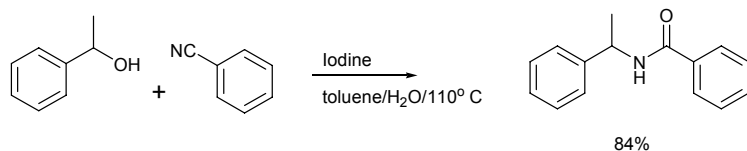

| Input                                              |              | Output                                    |         |
|----------------------------------------------------|--------------|-------------------------------------------|---------|
| 1-phenylethanol                                    | 1 g          | Crude <i>N</i> -(1-phenylethyl) benzamide | 1.55g   |
| Benzonitrile                                       | 0.93g        |                                           |         |
| Iodine                                             | 0.42 g       | Aqueous waste                             | 30.72 g |
| Water                                              | 0.3 g        |                                           |         |
| EtOAc                                              | 18 g (20 ml) |                                           |         |
| Na <sub>2</sub> S <sub>2</sub> O <sub>3</sub> (aq) | 15 g         | Organic Solvent Waste                     | 1.8 g   |
| Brine                                              | 15 g         |                                           |         |
| Total                                              | 50.65g       | Total                                     | 32.52 g |

$$\text{E-Factor, } \left( \frac{32.52 \text{ g of waste produced}}{1.55 \text{ g of crude product}} \right) = 20.98$$

$$\text{Mass Intensity, } \left( \frac{50.65 \text{ g of raw material used}}{1.55 \text{ g of crude product}} \right) = 32.67$$

$$\text{Atom Economy, } \left( \frac{225}{122 + 103} \right) \times 100 = 100\%$$

#### Assumptions

- 90% of organic solvents are recovered.



2) Calculations for the synthesis of *N*-(1-phenylethyl) benzamide catalysed by FeCl<sub>3</sub> 6H<sub>2</sub>O<sup>17</sup>.

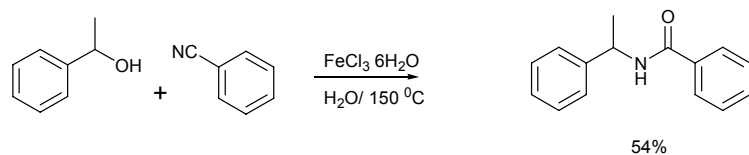

| Input                               |                 | Output                                    |        |
|-------------------------------------|-----------------|-------------------------------------------|--------|
| 1-phenylethanol                     | 1 g             | Crude <i>N</i> -(1-phenylethyl) benzamide | 0.99 g |
| Benzonitrile                        | 0.84g           |                                           |        |
| FeCl <sub>3</sub> 6H <sub>2</sub> O | 0.22 g          | Aqueous waste                             | 0.52 g |
| Water                               | 0.3 g           |                                           |        |
| EtOAc                               | 30.49 g (34 ml) |                                           |        |
|                                     |                 | Organic Solvent Waste                     | 3.04 g |
| Total                               | 32.85 g         | Total                                     | 3.56 g |

$$\text{E-Factor, } \left( \frac{3.56 \text{ g of waste produced}}{0.99 \text{ g of crude product}} \right) = 3.59$$

$$\text{Mass Intensity, } \left( \frac{32.85 \text{ g of raw material used}}{0.99 \text{ g of crude product}} \right) = 33.18$$

$$\text{Atom Economy, } \left( \frac{225}{122 + 103} \right) \times 100 = 100\%$$

Assumptions

1. 90% of organic solvents were recovered.
2. Calculations did not take into account of recrystallisation of the product.

3) Calculation for the synthesis of *N*-(1-phenylethyl) benzamide catalysed by Fe<sup>3+</sup>-Mont. K10<sup>18</sup>.

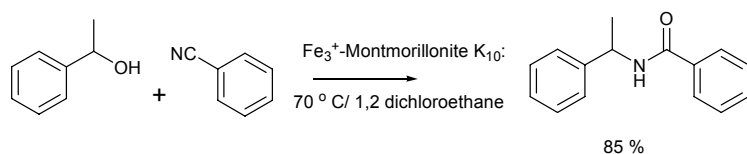

| Input                       |                  | Output                                    |         |
|-----------------------------|------------------|-------------------------------------------|---------|
| 1-phenylethanol             | 1 g              | Crude <i>N</i> -(1-phenylethyl) benzamide | 1.56g   |
| Benzonitrile                | 2.11 g           |                                           |         |
| Fe <sup>3+</sup> -Mont. K10 | 1.55 g           | Aqueous waste                             | 00 g    |
| 1,2-Dichloroethane          | 125.3 g (100 ml) | Organic Solvent Waste                     | 12.53 g |
| Total                       | 129.96 g         | Total                                     | 12.53 g |

$$\text{E-Factor, } \left( \frac{12.53 \text{ g of waste produced}}{1.56 \text{ g of crude product}} \right) = 8.03$$

$$\text{Mass Intensity, } \left( \frac{129.96 \text{ g of raw material used}}{1.56 \text{ g of crude product}} \right) = 83.30$$

$$\text{Atom Economy, } \left( \frac{225}{122 + 103} \right) \times 100 = 100\%$$

1. 90%recovery of organic solvents.
2. Calculations did not account for the synthesis of catalyst.
3. Calculations did not take into account of recrystallisation of the product.

4) Calculations for the synthesis of *N*-(1-phenylethyl) benzamide catalysed P<sub>2</sub>O<sub>5</sub>/SiO<sub>2</sub><sup>19</sup>.

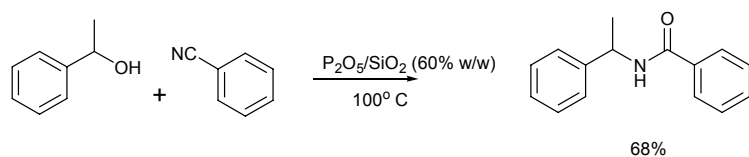

| Input                                           |                 | Output                                    |         |
|-------------------------------------------------|-----------------|-------------------------------------------|---------|
| 1-phenylethanol                                 | 1 g             | Crude <i>N</i> -(1-phenylethyl) benzamide | 1.25g   |
| Benzonitrile                                    | 0.84g           |                                           |         |
| P <sub>2</sub> O <sub>5</sub> /SiO <sub>2</sub> | 1.1 g           | Aqueous waste                             | 15 g    |
| EtOAc                                           | 57.40 g (64 ml) |                                           |         |
| NaHCO <sub>3</sub> (aq)                         | 15 g            | Organic Solvent Waste                     | 5.74 g  |
| Total                                           | 75.34 g         | Total                                     | 32.52 g |

$$\text{E-Factor, } \left( \frac{20.74 \text{ g of waste produced}}{1.25 \text{ g of crude product}} \right) = 16.59$$

$$\text{Mass Intensity, } \left( \frac{75.34 \text{ g of raw material used}}{1.25 \text{ g of crude product}} \right) = 60.27$$

$$\text{Atom Economy, } \left( \frac{225}{122 + 103} \right) \times 100 = 100\%$$

Assumptions

1. 90% of organic solvents were recovered.
2. Calculations did not account for the synthesis of catalyst.
3. Calculations did not take into account of recrystallisation of the product.

5) Calculations for the synthesis of *N*-(1-phenylethyl) benzamide catalysed by PMA/SiO<sub>2</sub><sup>20</sup>.

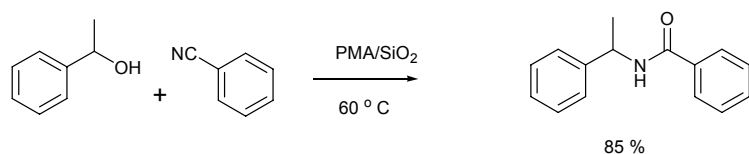

| Input                |                | Output                                    |        |
|----------------------|----------------|-------------------------------------------|--------|
| 1-phenylethanol      | 0.35 g         | Crude <i>N</i> -(1-phenylethyl) benzamide | 0.51 g |
| Benzonitrile         | 0.26 g         |                                           |        |
| PMA/SiO <sub>2</sub> | 0.25 g         | Aqueous waste                             | 20 g   |
| EtOAc                | 67.27 g (75ml) | Organic Solvent Waste                     | 6.72 g |
| Brine                | 20g            |                                           |        |
| Total                | 88.13 g        | Total                                     | 26.72g |

$$\text{E-Factor, } \left( \frac{26.72 \text{ g of waste produced}}{0.51 \text{ g of crude product}} \right) = 52.39$$

$$\text{Mass Intensity, } \left( \frac{88.13 \text{ g of raw material used}}{0.51 \text{ g of crude product}} \right) = 172.80$$

$$\text{Atom Economy, } \left( \frac{225}{122 + 103} \right) \times 100 = 100\%$$

Assumptions

1. 90% recovery of organic solvents.
2. Calculations did not account for the synthesis of the catalyst.
3. Calculations did not take into account of recrystallisation of the product.

6. Calculations for the synthesis of *N*-(1-phenylethyl) benzamide catalysed by Sulfated tungstate.

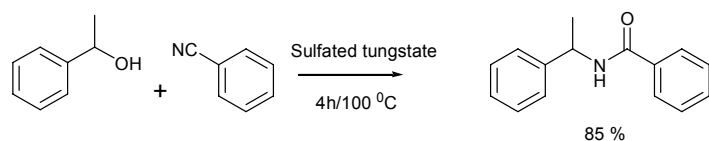

| Input              |                 | Output                                    |        |
|--------------------|-----------------|-------------------------------------------|--------|
| 1-phenylethanol    | 1 g             | Crude <i>N</i> -(1-phenylethyl) benzamide | 1.56 g |
| Benzonitrile       | 0.84g           |                                           |        |
| Sulfated tungstate | 0.36 g          | Aqueous waste                             | 00 g   |
| EtOAc              | 13.45 g (15 ml) |                                           |        |
|                    |                 | Organic Solvent Waste                     | 1.34 g |
| Total              | 15.70 g         | Total                                     | 1.34 g |

$$\text{E-Factor, } \left( \frac{1.34 \text{ g of waste produced}}{1.56 \text{ g of crude product}} \right) = 0.85$$

$$\text{Mass Intensity, } \left( \frac{15.70 \text{ g of raw material used}}{1.56 \text{ g of crude product}} \right) = 10.06$$

$$\text{Atom Economy, } \left( \frac{225}{122 + 103} \right) \times 100 = 100\%$$

Assumptions

- 1 90% recovery of organic solvents.
- 2 Calculations did not account for the synthesis of the catalyst.
- 3 Calculations did not take into account of recrystallisation of the product.

### D) NMR Spectra:

Entry 1) *N*-*tert*-butylacetamide

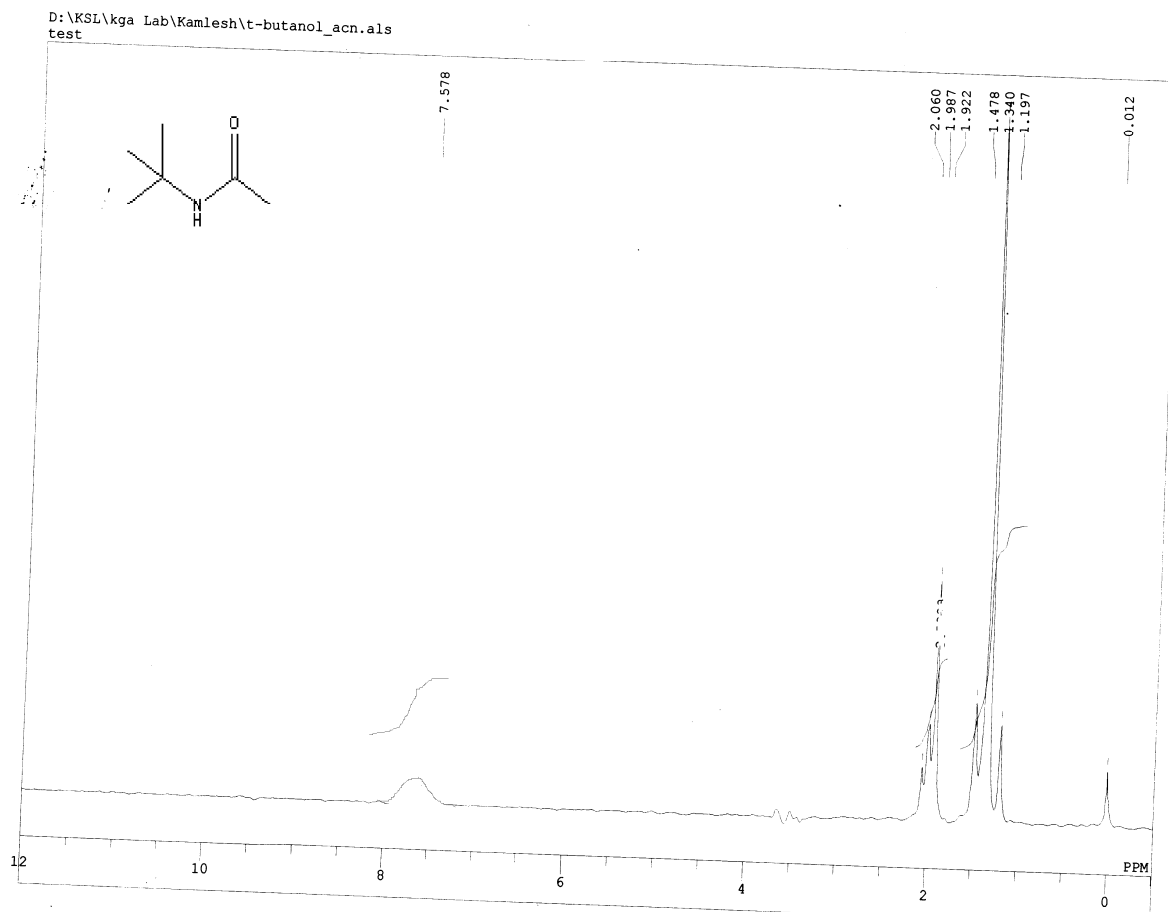

Entry 2)  $N^1, N^3$ -di-*tert*-butylmalonamide

D:\kga Lab\Kamlesh\ter butanol\_malanonitrile.als  
test

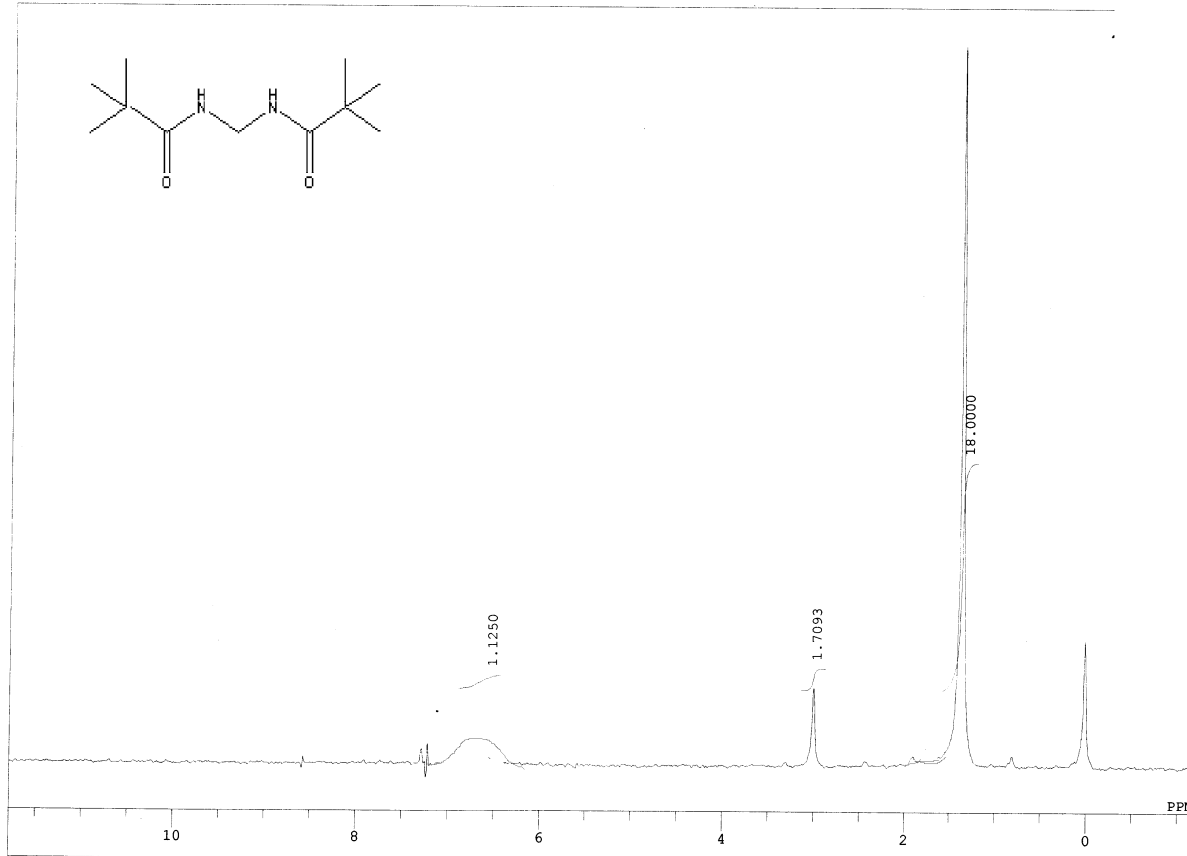

Entry 3) *N-tert*-butylacrylamide

D:\kga Lab\Kamlesh\ter butanol and acrylonitrile.als  
test

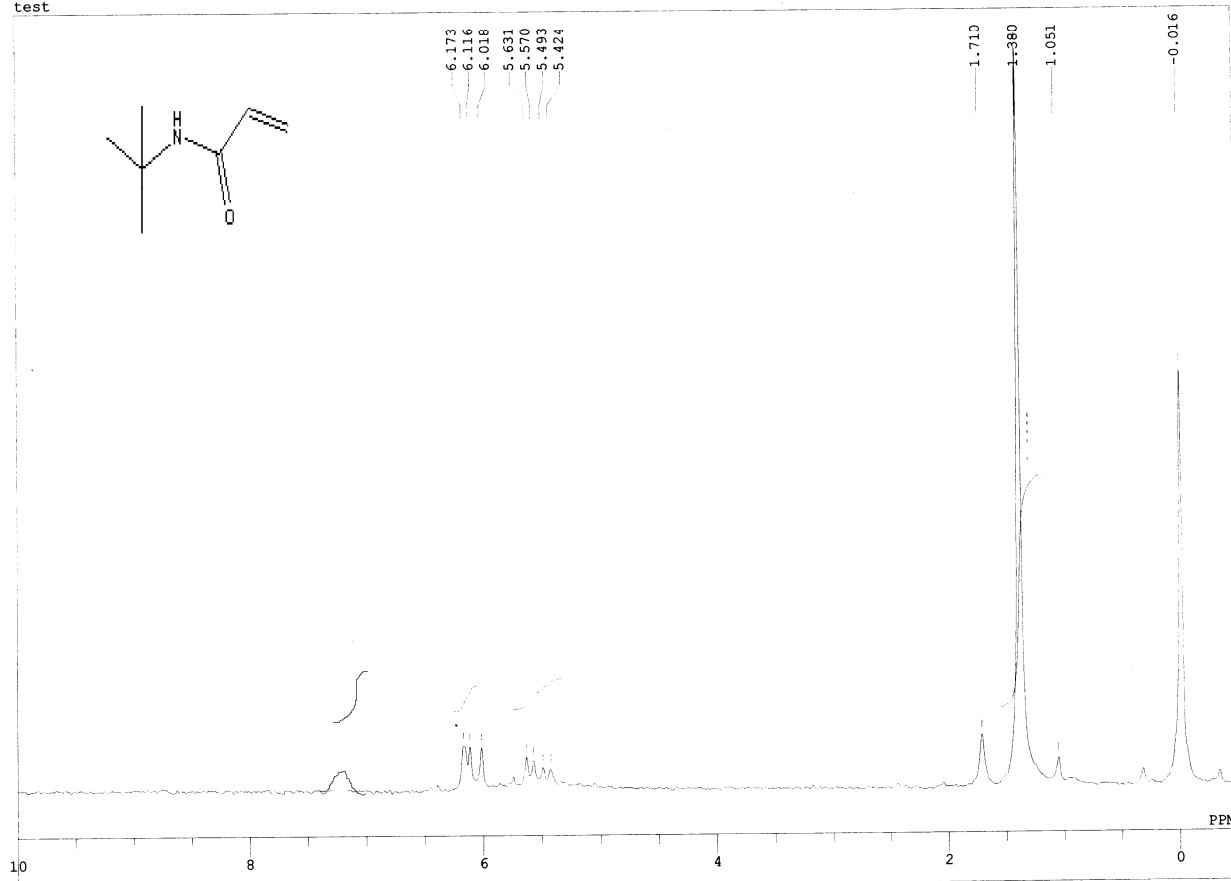



Entry 4) *N-tert*-butylbenzamide

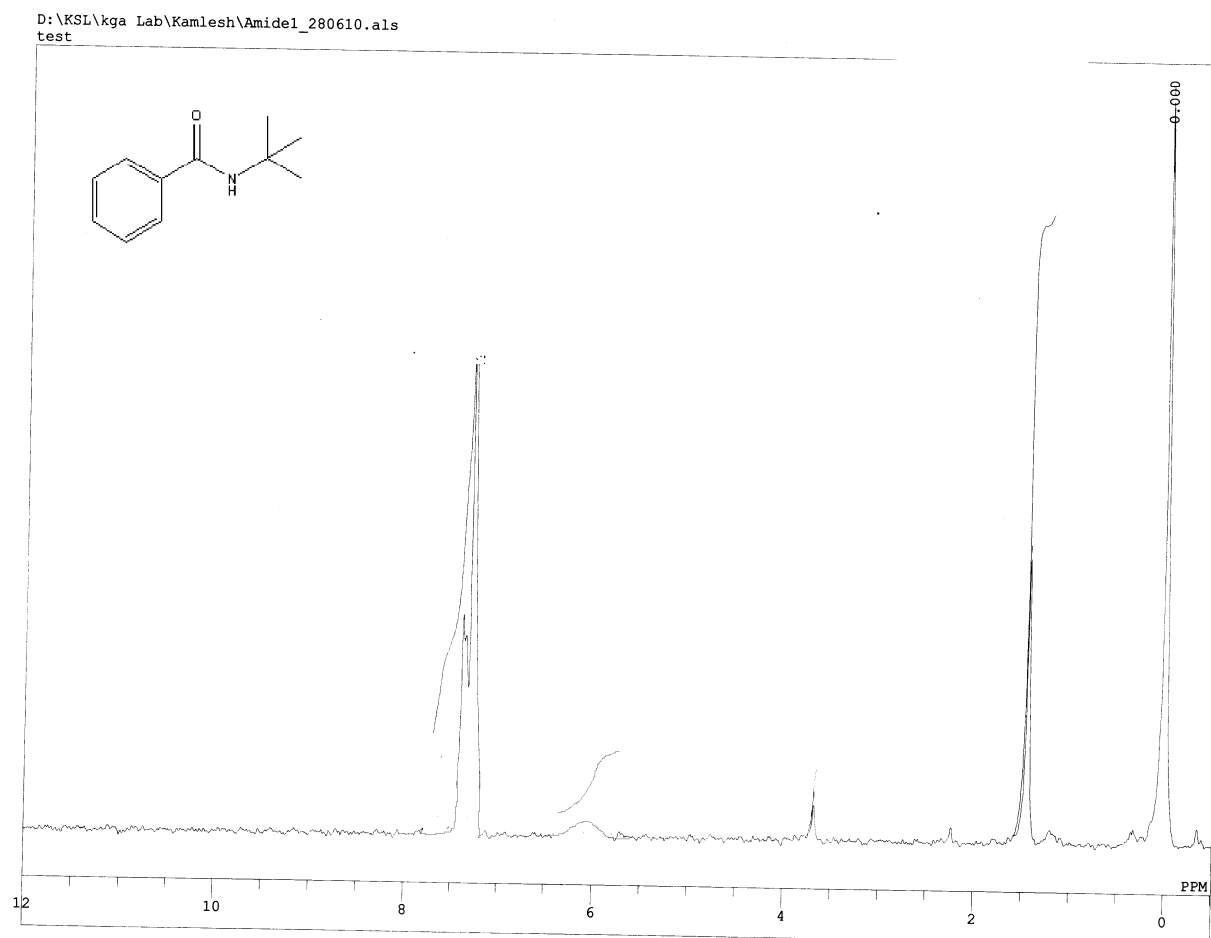

Entry 5) *N-tert-butyl-2-chlorobenzamide*

D:\kga Lab\Kamlesh\2 chlorobezonitrile\_terbytanol.als  
test

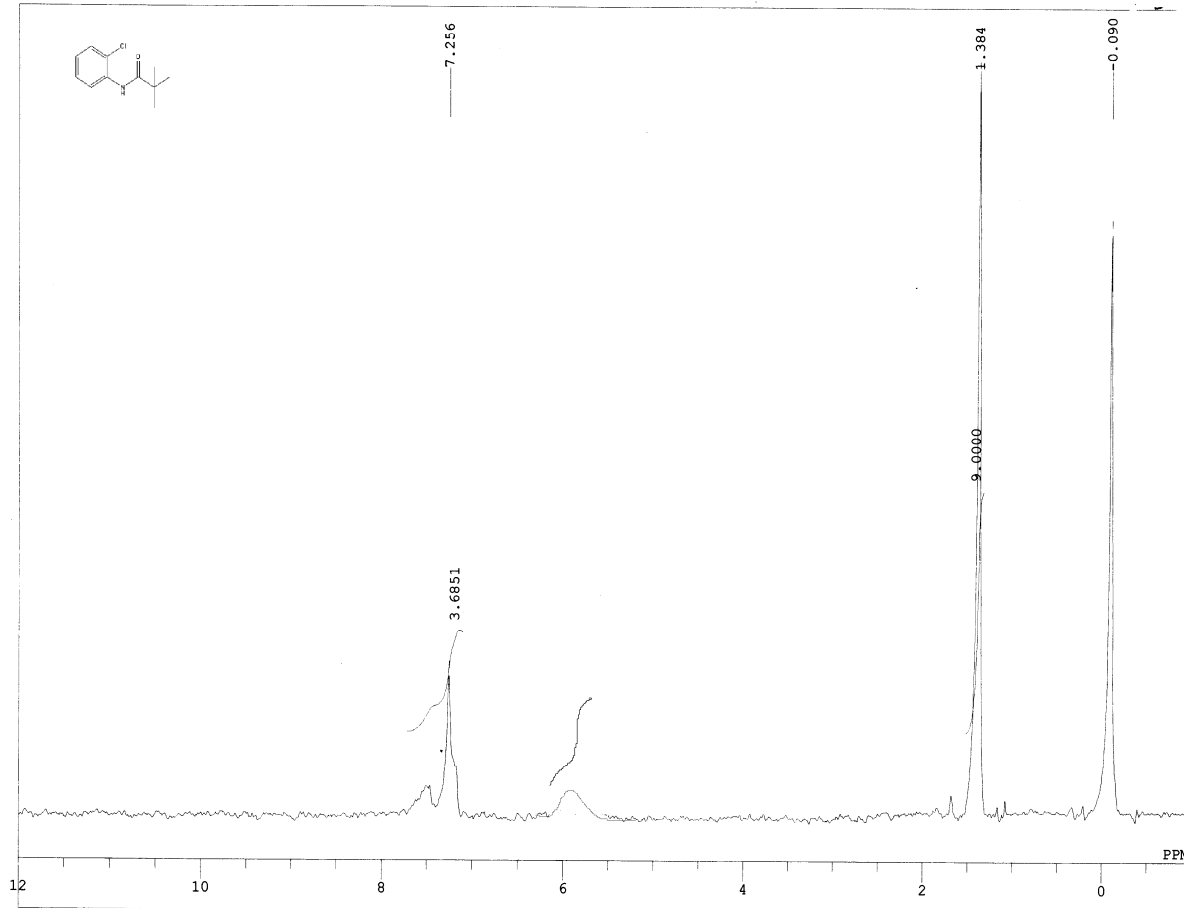

Entry 6) *N-tert-butyl-2-phenylacetamide*

D:\kga Lab\Kamlesh\terbutabol\_benzyl cyanide.als  
test

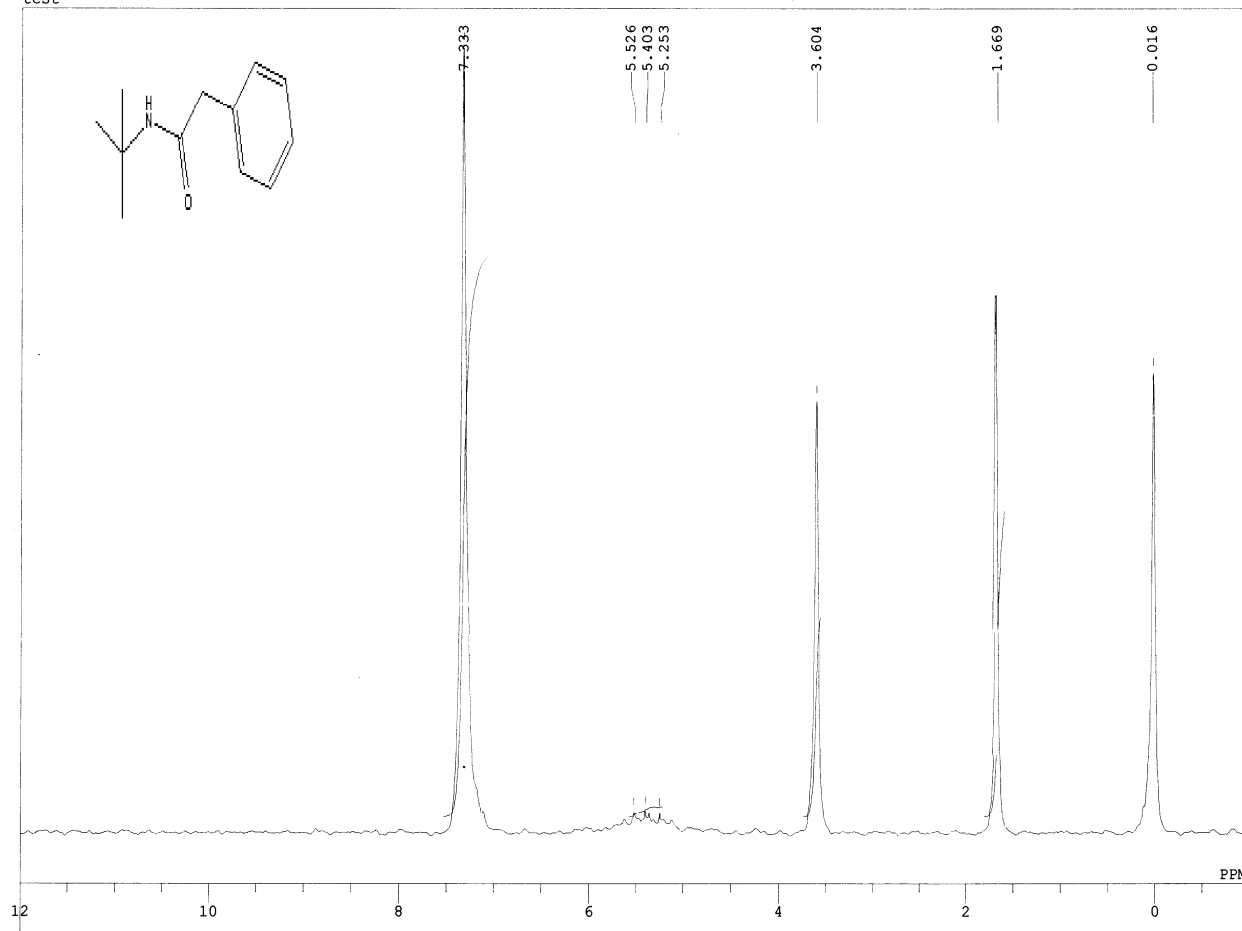

Entry 7) *N*-(1-phenylethyl)acetamide

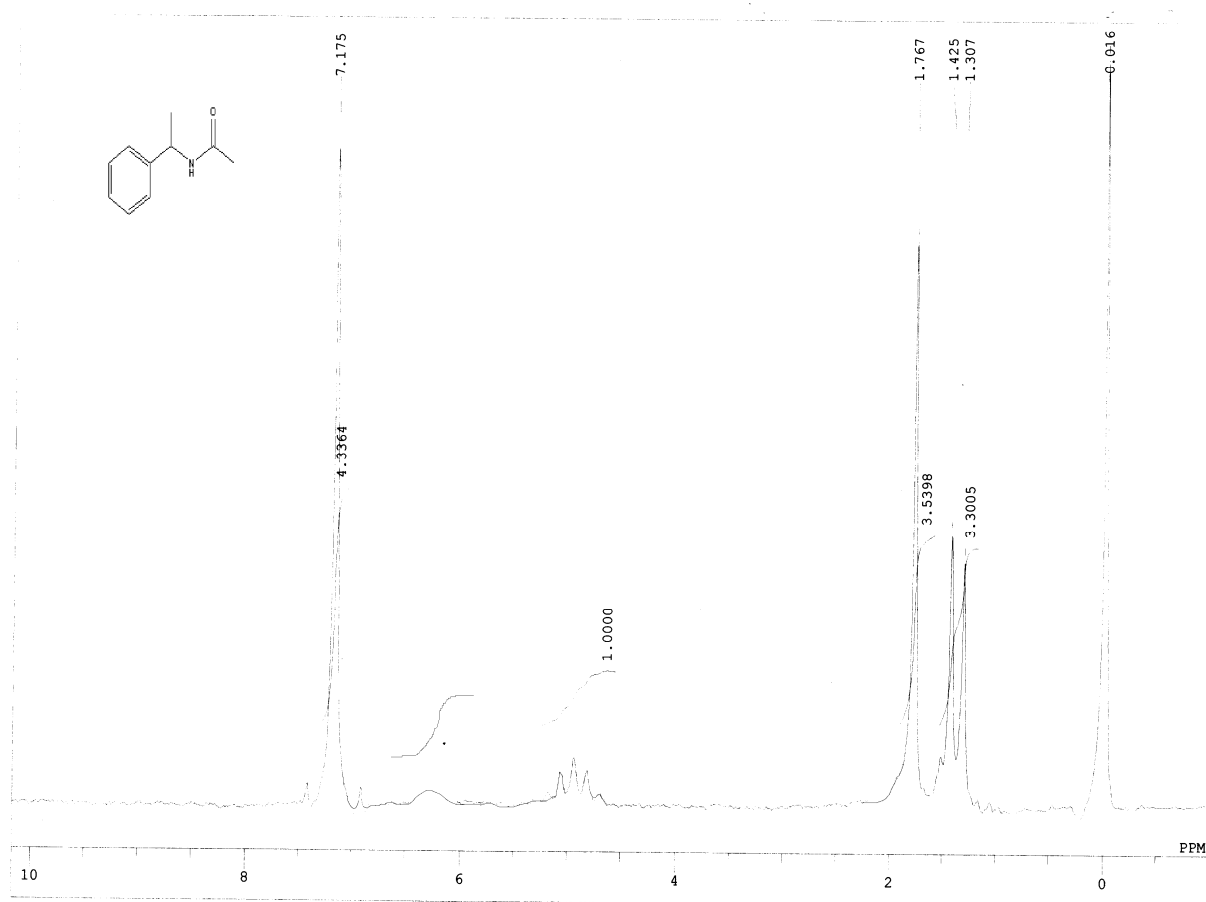

Entry 8) 2-chloro-N-(1-phenylethyl)acetamide

D:\KSL\kga Lab\Kamlesh\1-phenyl ethanol\_chloro ACN.als  
test

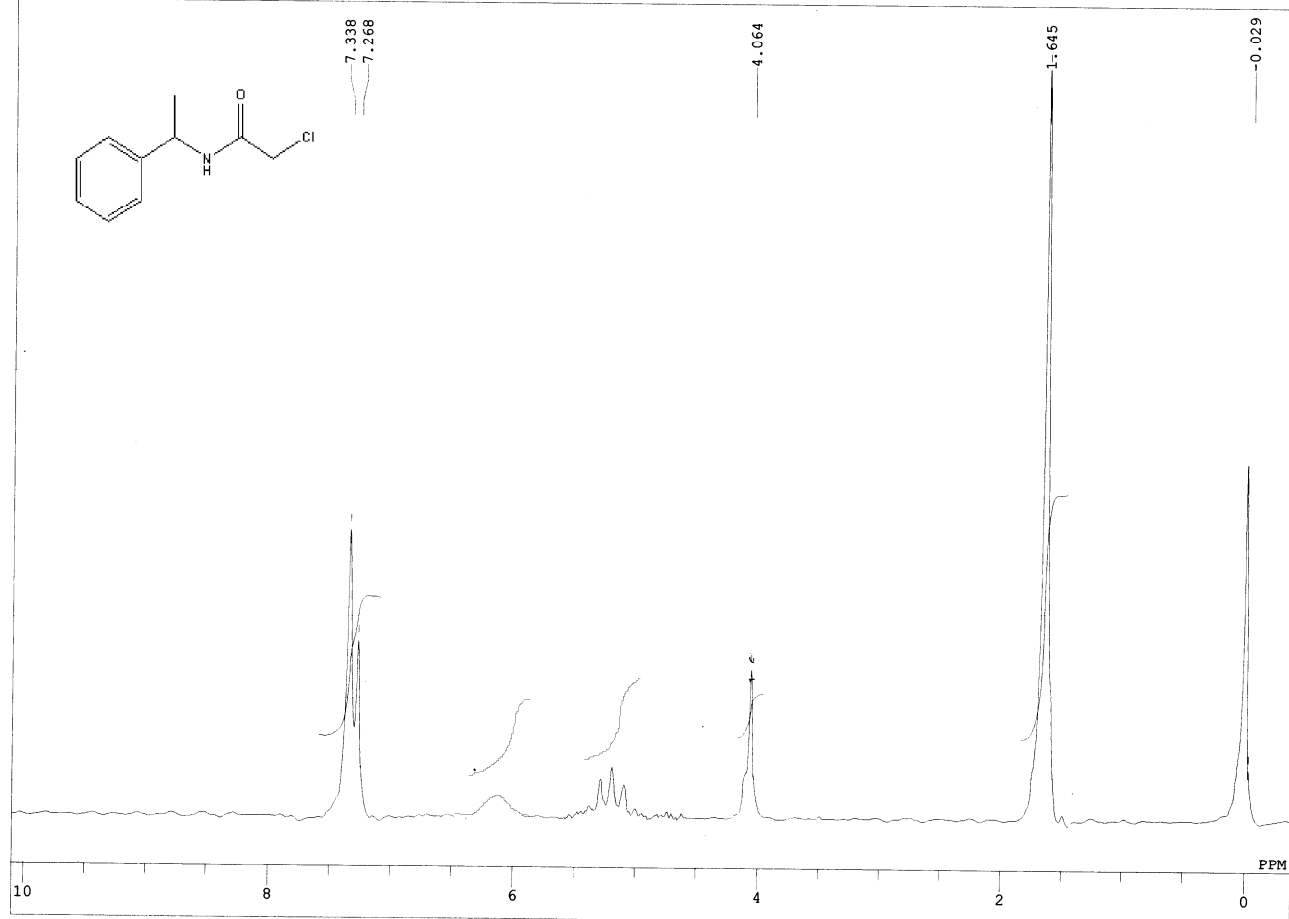

Entry 9) *N*-(1-Phenylethyl)benzamide

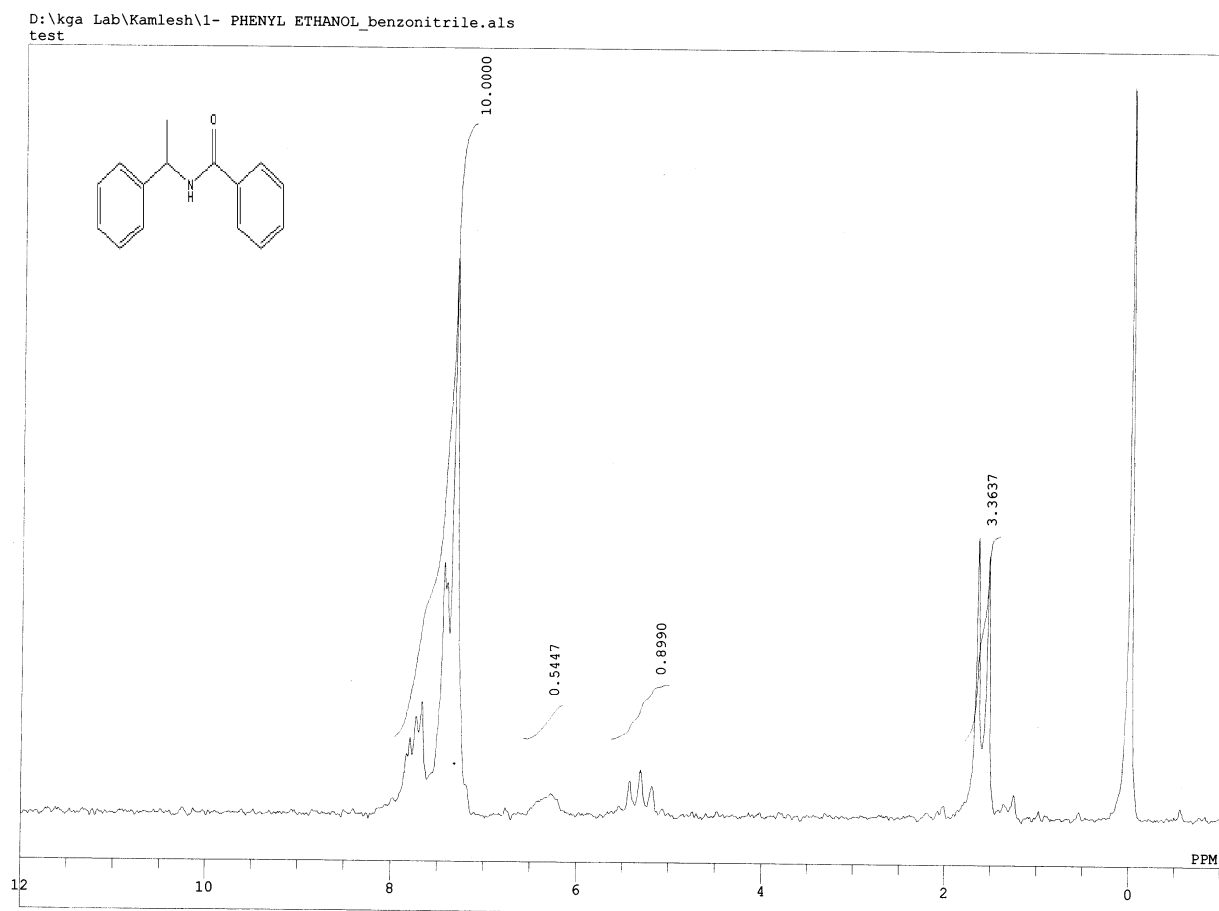

Entry 10) 2-phenyl-N-(1-phenylethyl)acetamide

D:\kga Lab\Kamlesh\1-phenyl ethanol\_benzyl cyanide.als  
test

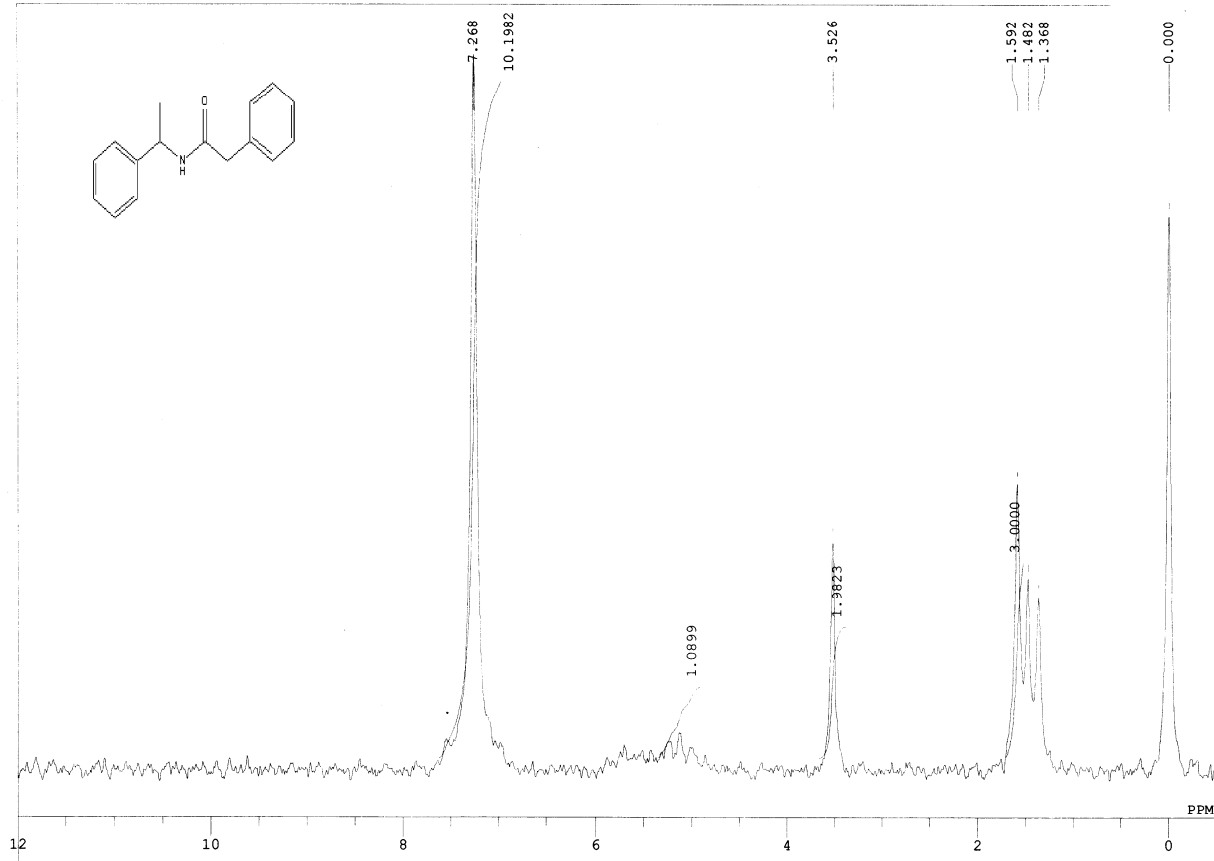

Entry 11) 2-(4-chlorophenyl)-*N*-(1-phenylethyl)acetamide

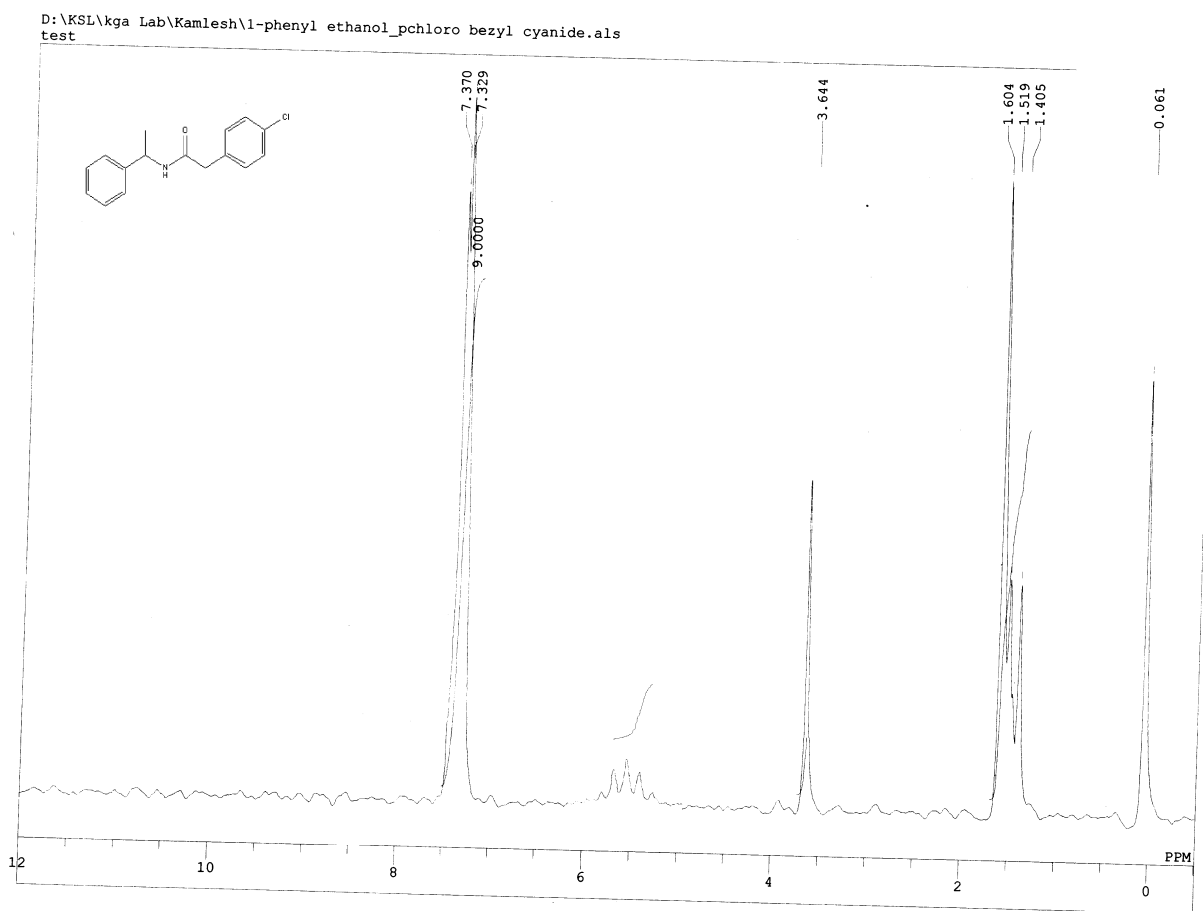



Entry 12) *N*-(1-phenylethyl)isonicotinamide

D:\KSL\kga Lab\Kamlesh\1-phenyl ethanol\_pcyano pyridine.als  
test

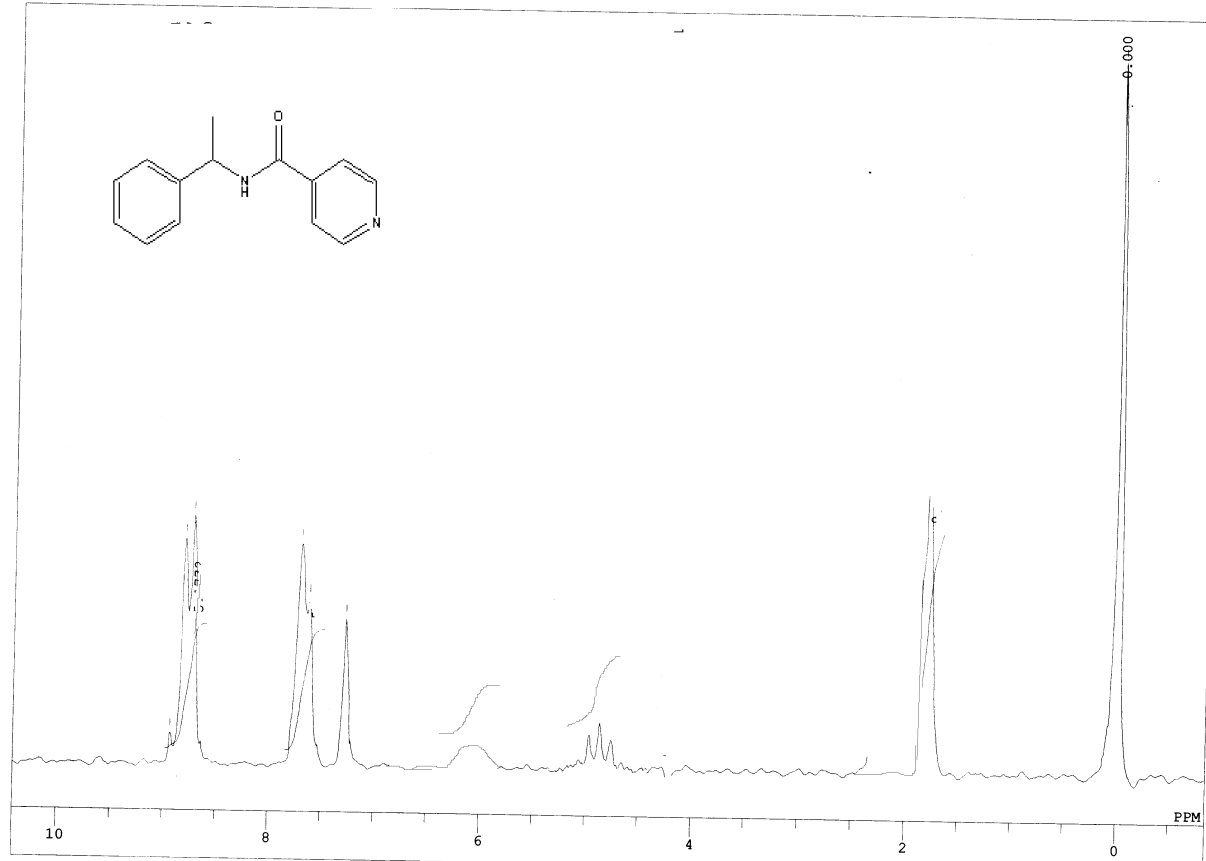

Entry 13) *N*-benzhydrylacetamide

D:\kga Lab\Kamlesh\benzhydrol\_acetonitrile.als  
test

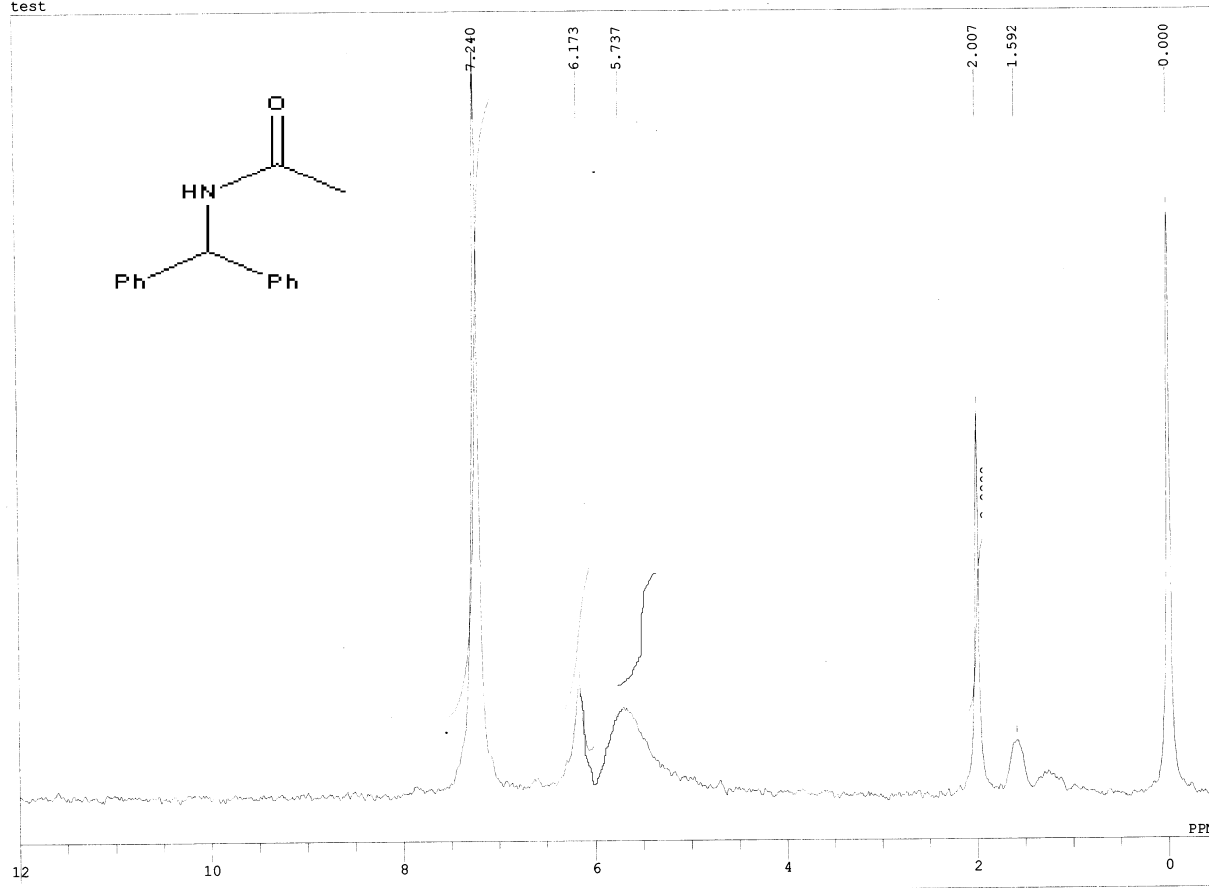

Entry 14) *N*-benzhydrylbenzamide

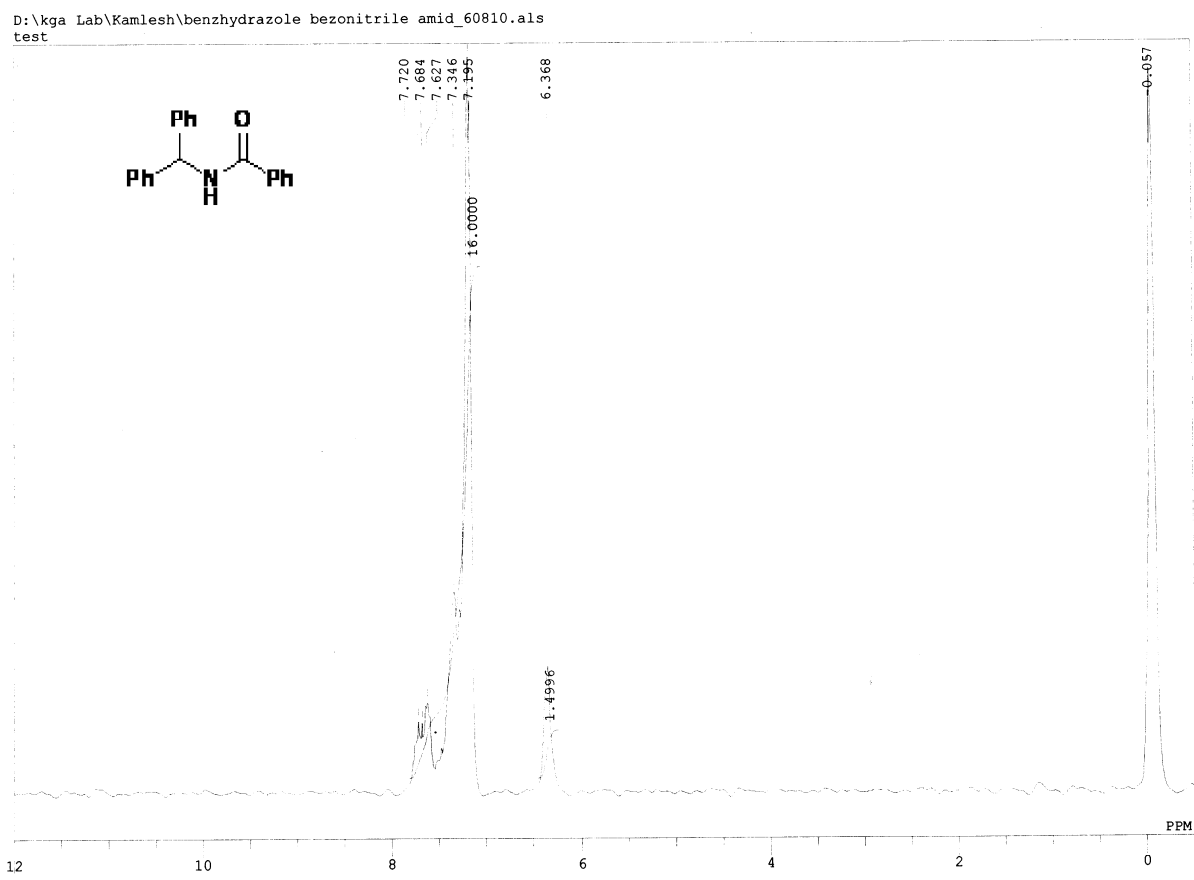

Entry 15) *N*-benzhydryl-2-phenylacetamide

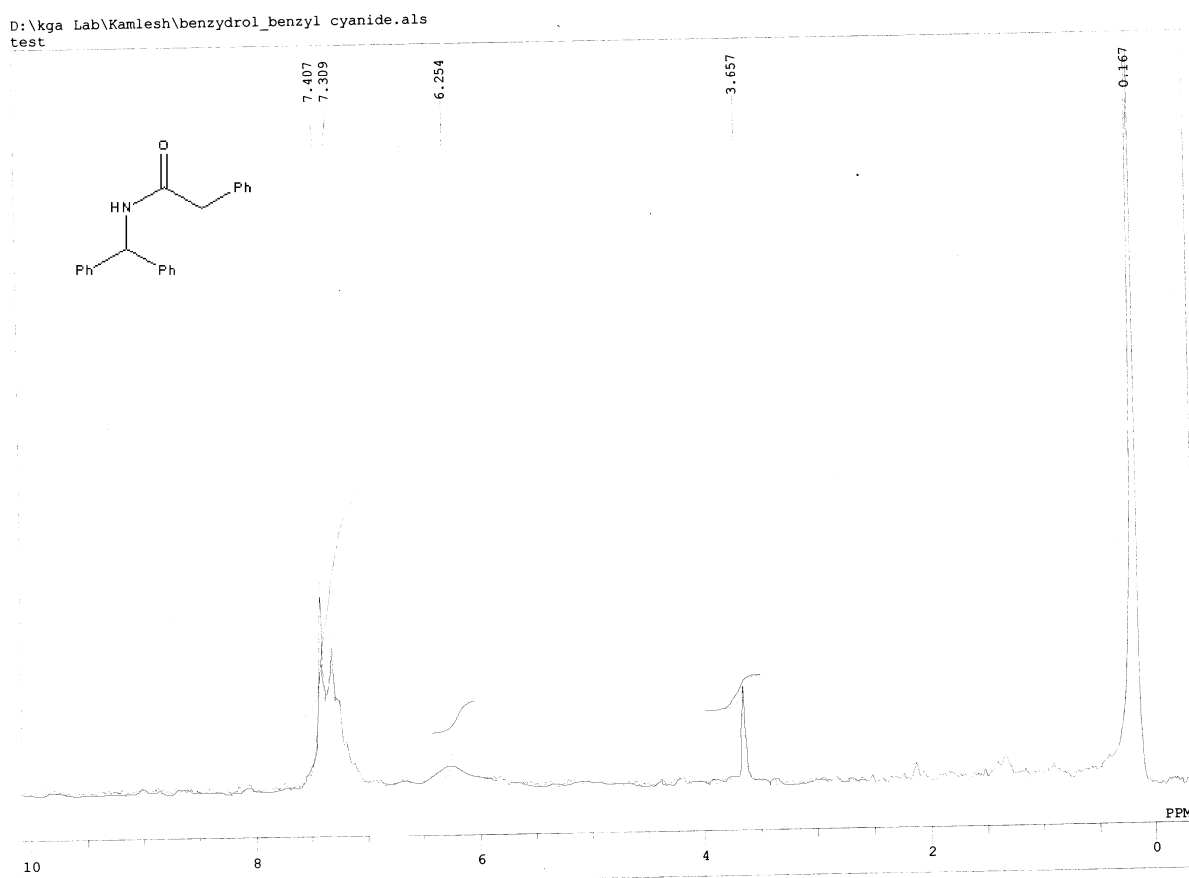

Entry 16) *N*-benzhydrylisonicotinamide

D:\KSL\kga Lab\Kamlesh\benzhydrol\_pcyano pyrdine.als  
test

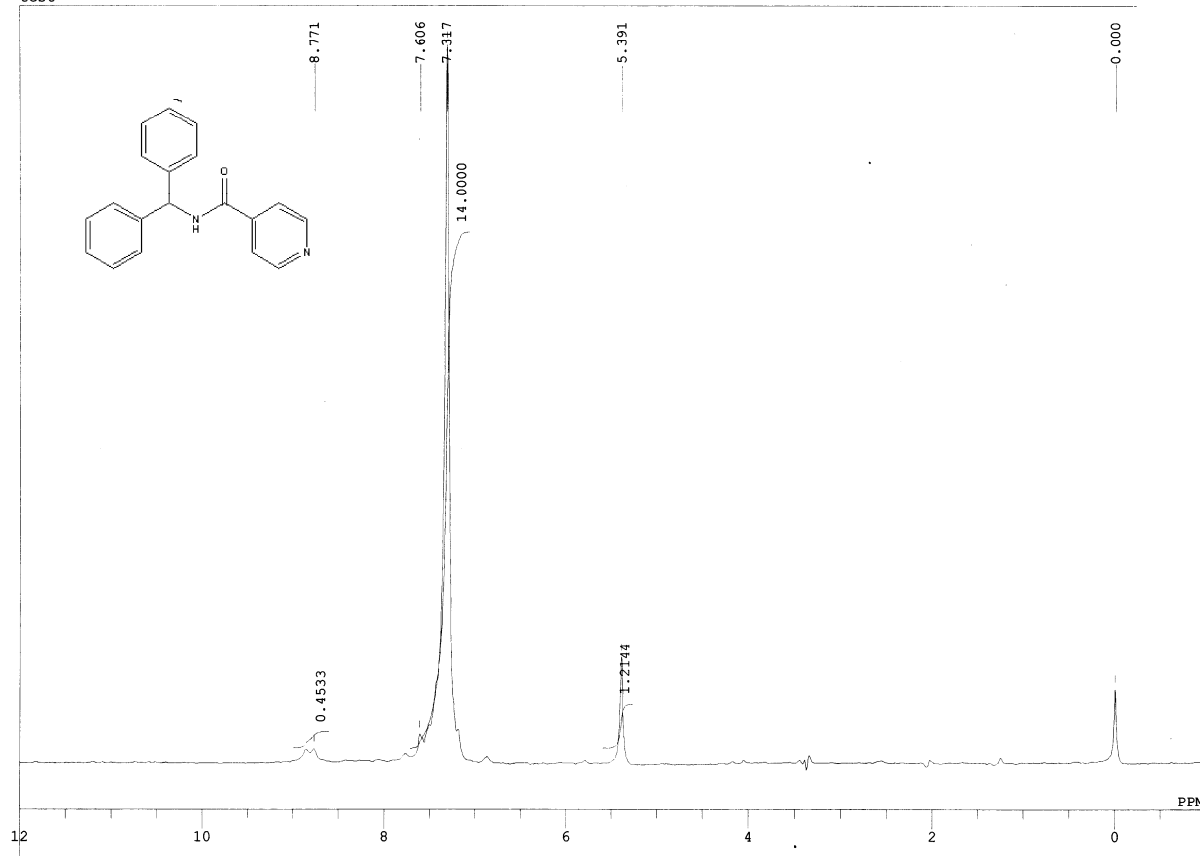

Entry 17) *N*-Benzylbenzamide

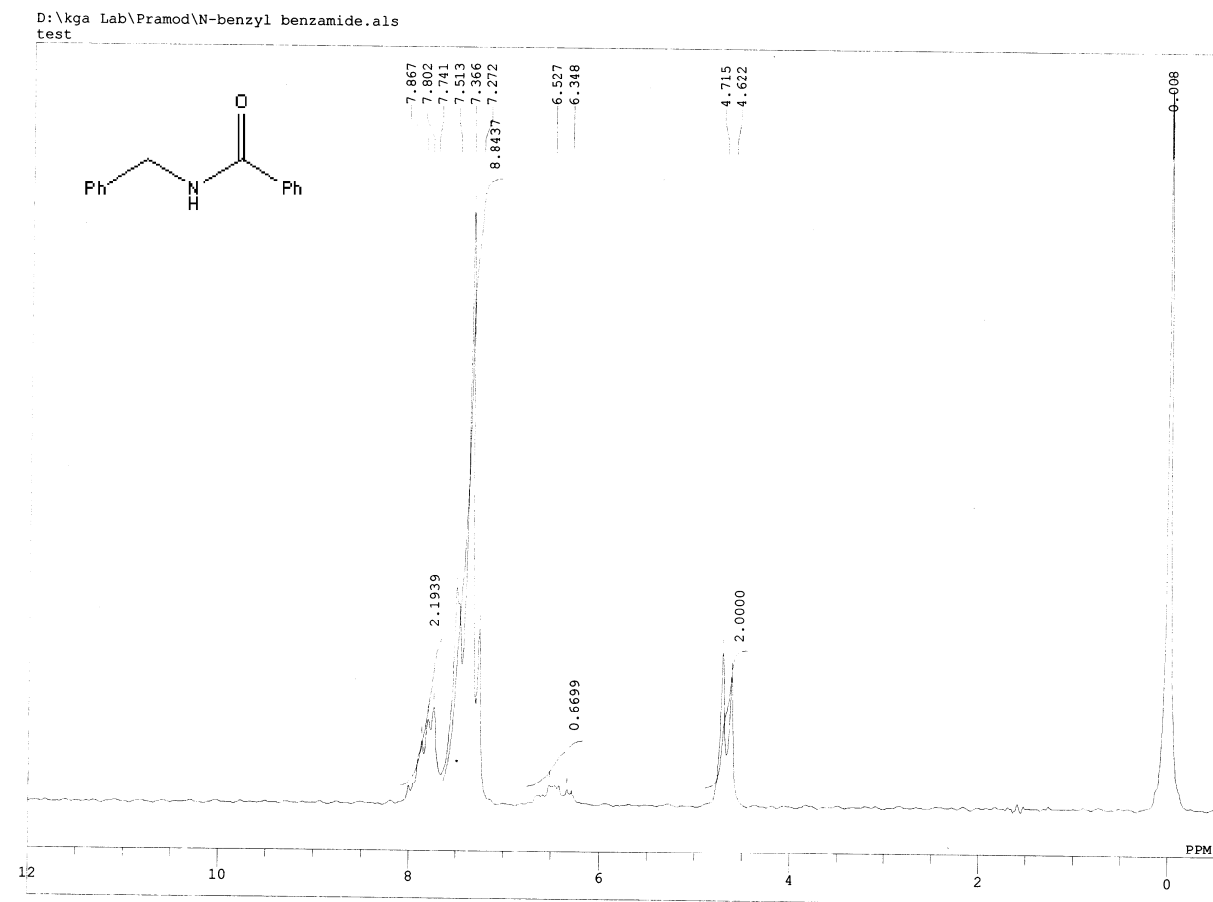

Entry 18) *N*-Benzyl-2-phenylacetamide

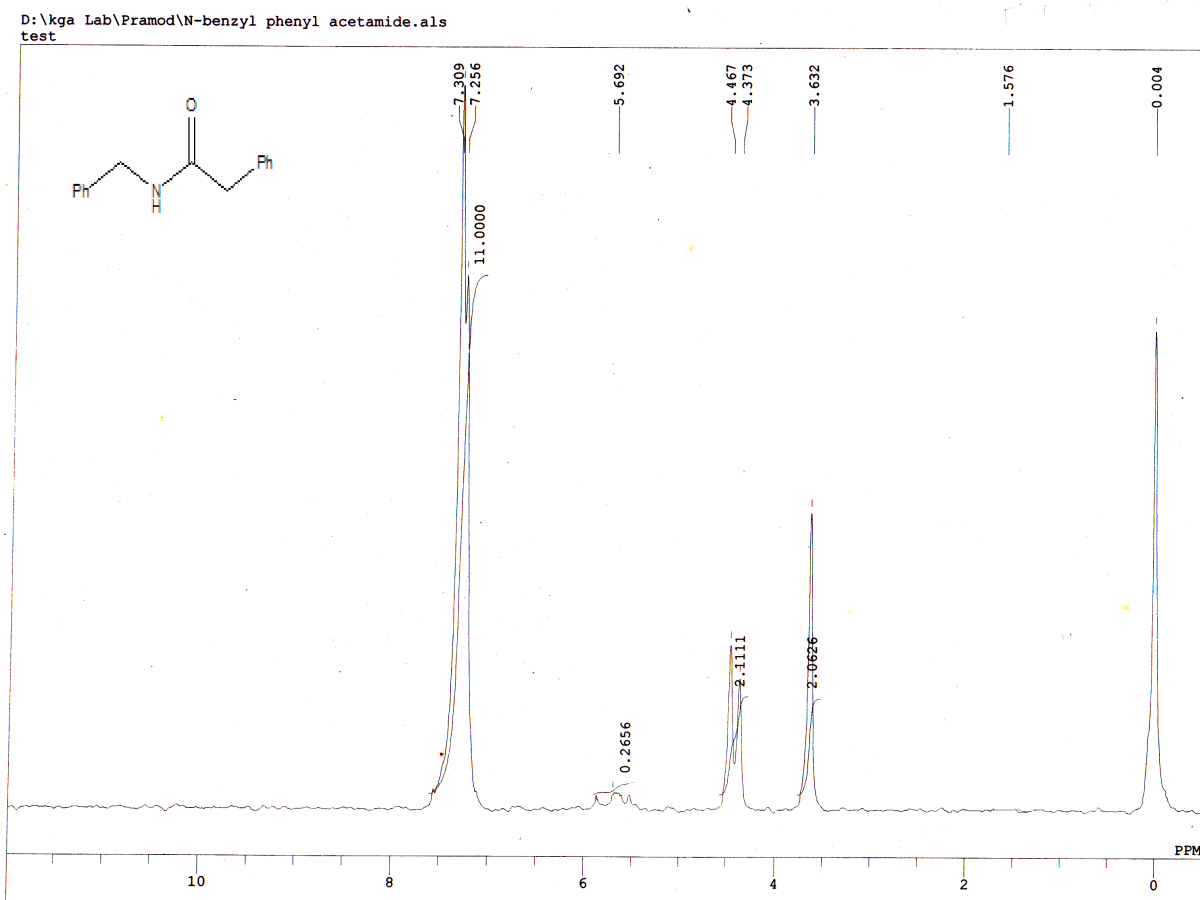

Entry 19) *N*-cyclohexylbenzamide

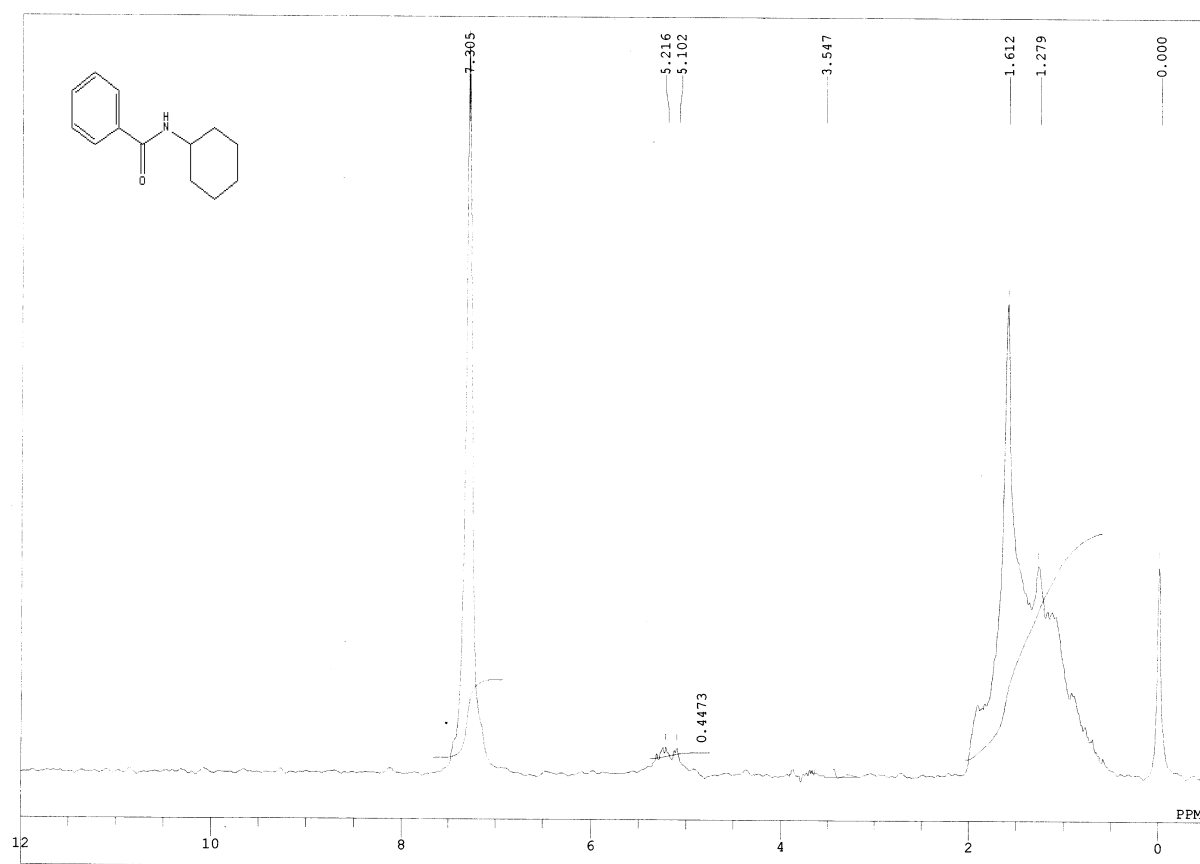



Entry 20) ( $\pm$ ) *exo*-N- bornylbenzamide

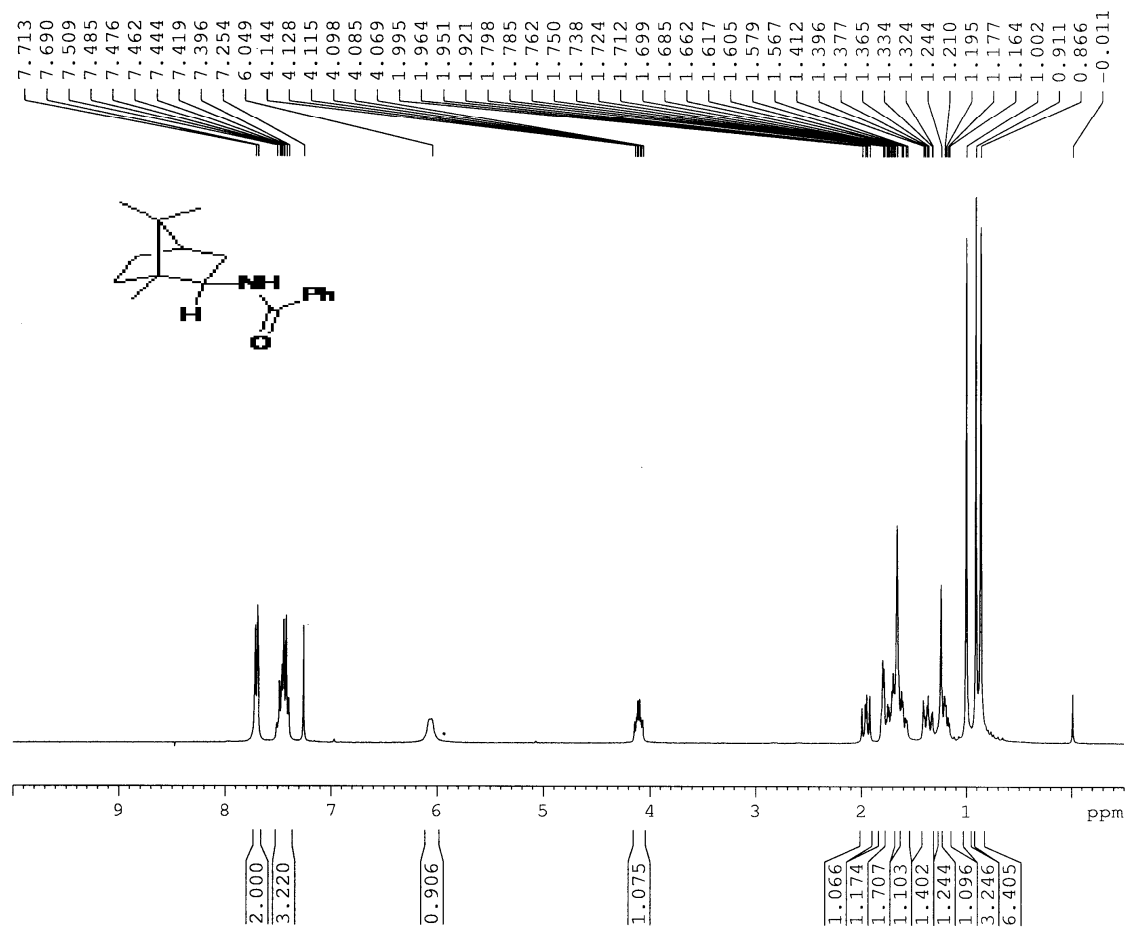

Entry 21) ( $\pm$ ) *exo*-N-bornyl-2-phenylacetamide

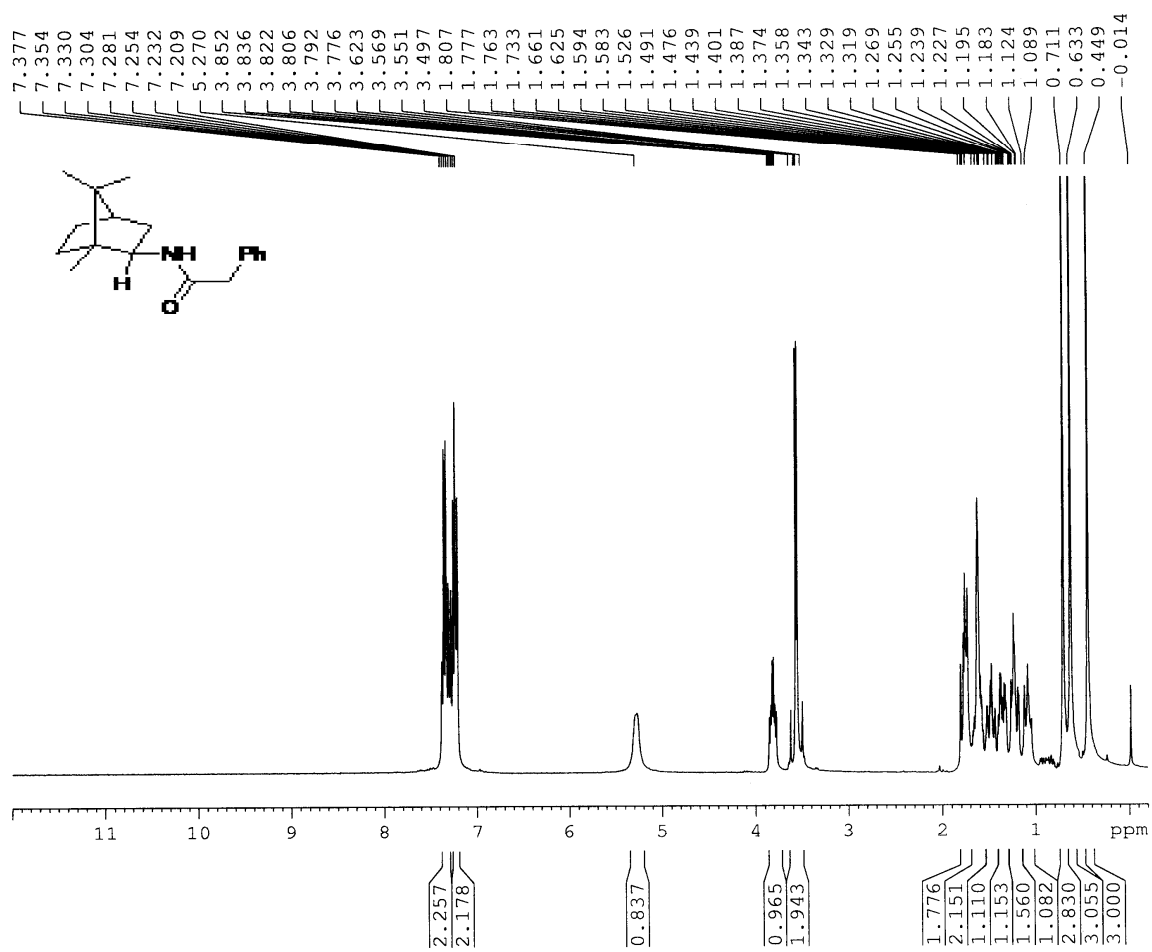

## E) References:

1. a) J. R. Bowser, *J. Org. Chem.*, 1983, **48**, 4111; b) R. Nomura, *J. Org. Chem.*, 1991, **56**, 4076; c) L. Mamani, A. Heydari and M. Sheykhan, *Applied Catalysis A: General*, 2010, **39**, 122.
2. K. Niknam, M. A. Zolfigol, T. Sadabadia; *J. Iran. Chem. Soc.* 2007, **4**, 199.
3. T. Okuhara, X. Chen, *Microporous and Mesoporous Materials*. 2001, **48**, 293.
4. B. B. F. Mirjalilia and B. Sadeghi, *Iran. J. Org. Chem.* 2009, **2**, 76.
5. a) P. Theerthagiri, A. Lalitha, P. N. Arunachalam, *Tetrahedron Lett.* 2010, **51**, 2813. b) X. Wan, Z. Ma, B. Li, K. Zang, S. Cao, S. Zhang, Z. Shi, *J. Am. Chem. Soc.* 2006, **128**, 7416.
6. (a) K. L. Reddy, *Tetrahedron Lett.* 2003, **44**, 1453; (b) J. C. Baum, J. E. Milne, J. A. Murry, O. R. Thiel, *J. Org. Chem.* 2009, **74**, 2207.
7. a) B. Kumar, H. Kumar, and N. Singh, *Indian J. Chem.*, 1991, **30B**, 460; b) H. Firouzabadi, A. R. Sardarian. and H. Badparva, *Synth. Commun.*, 1994, **24**, 601.
8. R. Allmann, A. Frankowski and J. Streith, *Tetrahedron*, 1972, **28**, 581.
9. P. Salehi and A. R. Motlagh, *Synth. Commun.* 2000, 671.
10. A. A. Bakibaev, *Khimiko-Farmatsevticheskii Zhurnal*, 1989, **23**, 1455.
11. B. Adele; D. M. Vittoria, M., Orazio and G. Federico, *Tetrahedron*, 1991, **47**, 7417.
12. A. R. Katritzky, C. Cai and S. K. Singh, *J. Org. Chem.*, 2006, **71**, 3375.
13. J. Youngshin, *J. Org. Chem.*, 2009, **74**, 6358.
14. Y. Kasashima, A. Uzawa, K. Hashimoto, Y. Yokoyama, T. Mino, M. Sakamoto, and T. Fujita, *J. Oleo Science*, 2010, **59**, 607.
15. M. Mousseron, *Bull. Soc. Chim. Fr.* 1947, 868.
16. P. Theerthagiri, A. Lalitha, P. N. Arunachalam, *Tetrahedron Lett.* 2010, **51**, 2813.
17. B. Anxionnat, A. Guérinot, S. Reymond and J. Cossy, *Tetrahedron Lett*, 2009, **50**, 3470.
18. M. M. Lakourag, B. Movassagh and J. Fasihi, *Synth. Commun.* 2000, **30**, 821.
19. F. Tamaddon, M. Khoobi and E. Keshavarz, *Tetrahedron Lett*, 2007, **48**, 3643.
20. J. S. Yadav, B. V. S. Reddy, T. Pandurangam, Y. J. Reddy and M. K. Gupta. *Catal. Commun.* 2008, **9**, 1297.
